# Supplementary material
Source: PubMed Central journal article supplement (PMC3823629)
Supplement: NIHMS494283-supplement-02.pdf [file NIHMS494283-supplement-02.pdf]

# Glutathione redox dynamics and expression of glutathione-related genes in the developing embryo

Alicia R. Timme-Laragy, Jared V. Goldstone, Barry R. Imhoff, John J. Stegeman,

Mark E. Hahn, Jason M. Hansen

## *Supplemental File 2.*

Glutathione parameters in adult female livers. Data are presented as mean  $\pm$  SEM.

| <b>GSH<sub>T</sub></b> | <b>GSH</b>     | <b>GSSG</b>   | <b>E<sub>h</sub></b> |
|------------------------|----------------|---------------|----------------------|
| 16.9 $\pm$ 0.7         | 12.2 $\pm$ 0.5 | 2.4 $\pm$ 0.1 | -218 $\pm$ 1         |
