# Supplementary material
Source: PubMed Central journal article supplement (PMC3823629)
Supplement: NIHMS494283-supplement-03.pdf [file NIHMS494283-supplement-03.pdf]

## Glutathione redox dynamics and expression of glutathione-related genes in the developing embryo

Alicia R. Timme-Laragy, Jared V. Goldstone, Barry R. Imhoff, John J. Stegeman,

Mark E. Hahn, Jason M. Hansen

### *Supplemental File 3. Protein measurements per embryos*

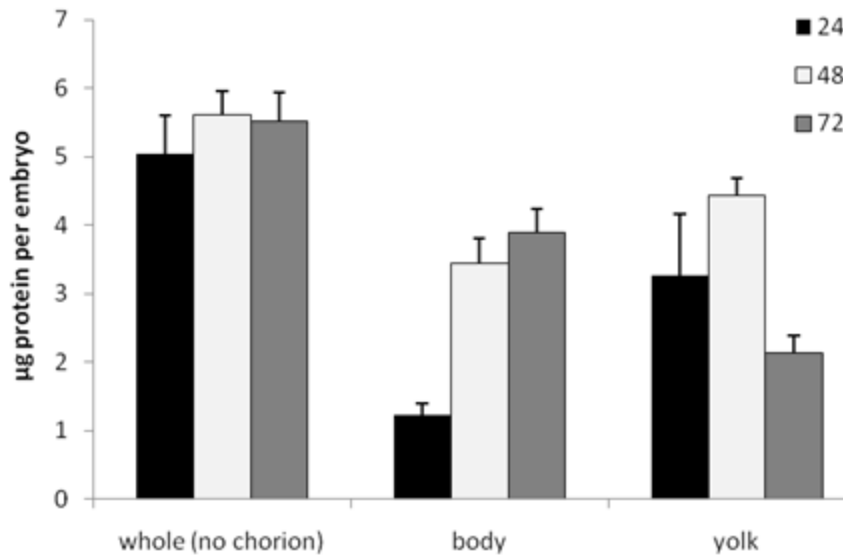

Supplemental file 2: Protein measurements per embryo at 24, 48, and 72 hpf. Embryos were measured after manual removal of the chorion as either intact whole embryos, as well as dissected components of body and yolk of age-matched embryos. Dissections were conducted following embryo fixation. Data are presented as the mean and SEM, and  $N = 3$  pools of 20 embryos.
