# Supplementary material
Source: PubMed Central journal article supplement (PMC3823629)
Supplement: NIHMS494283-supplement-04.pdf [file NIHMS494283-supplement-04.pdf]

## Glutathione redox dynamics and expression of glutathione-related genes in the developing embryo

Alicia R. Timme-Laragy, Jared V. Goldstone, Barry R. Imhoff, John J. Stegeman,

Mark E. Hahn, Jason M. Hansen

*Supplemental file 4*

### Glutathione dynamics in developing vertebrate animals:

#### Comparison of studies and methods

| Species                                                         | Measurements                    | Method                  | Developmental stages examined                                                    | Findings                                                                                                                | Reference |
|-----------------------------------------------------------------|---------------------------------|-------------------------|----------------------------------------------------------------------------------|-------------------------------------------------------------------------------------------------------------------------|-----------|
| frog<br>( <i>Xenopus laevis</i> )                               | GSH <sub>T</sub>                | spectro-<br>photometric | Daily from 1-7 dpf (Stages 22-48 encompassing hatching, organogenesis.           | Increased GSH <sub>T</sub> from stage 22 to 44/45                                                                       | [68]      |
| frog<br>( <i>Rana ridibunda</i><br>and<br><i>Bufo viridis</i> ) | GSH <sub>T</sub> ; GSH;<br>GSSG | spectro-<br>photometric | Weeks 1, 3, 5, 8 post fertilization                                              | Increase in GSH and GSHT with later stages (5 <sup>th</sup> and 8 <sup>th</sup> week), increase in GSSG at week 3 and 8 | [69]      |
| crocodile<br>( <i>Caiman yacare</i> )                           | GSH <sub>T</sub> ; GSH;<br>GSSG | spectro-<br>photometric | Embryo, juvenile, adult, in liver, kidney, lung, brain, heart, muscle            | Increase in GSH and GSHT from embryos to juvenile and adult stages, decrease in GSSG from embryo to juvenile stages.    | [70]      |
| rat<br>( <i>Rattus norvegicus</i> )                             | GSH <sub>T</sub>                | spectro-<br>photometric | Males only, GD20 and post natal days 1,3,5,7,14,21,28,42,63,84,112               | Increase GSH <sub>T</sub> at PND 3, 7, 112.                                                                             | [71]      |
| mouse<br>( <i>Mus musculus</i> )                                | GSH <sub>T</sub> ; GSH;<br>GSSG | HPLC                    | Oocyte, fertilized embryo, 2 cell, 4 cell, to GD3 (blastocyst, pre-implantation) | GSSG not detected until blastocyst, decrease in GSH between oocytes and blastocyst                                      | [72]      |
| cod                                                             | GSH <sub>T</sub> ; GSH;         | spectro-                | Oocytes, sperm, in depth sampling of                                             | GSH <sub>T</sub> increased through the hatching gland                                                                   | [74]      |

|                                   |                                                 |             |                                                                                                                          |                                                                                                                                                                                                                                                                                                                                            |            |
|-----------------------------------|-------------------------------------------------|-------------|--------------------------------------------------------------------------------------------------------------------------|--------------------------------------------------------------------------------------------------------------------------------------------------------------------------------------------------------------------------------------------------------------------------------------------------------------------------------------------|------------|
| <i>(Gadus morhua)</i>             | GSSG; E <sub>h</sub>                            | photometric | cleavage, blastula, gastrulation, through pre-hatch embryos (Hall stages 6.5-23                                          | stage, GSSG increased after gastrulation                                                                                                                                                                                                                                                                                                   |            |
| zebrafish<br><i>(Danio rerio)</i> | GSH <sub>T</sub> ; GSH;<br>GSSG; E <sub>h</sub> | HPLC        | Oocytes, mid-blastula transition, gastrulation, segmentation, pharyngula, pre-hatch, hatched eleutherolarvae (0-120 hpf) | GSH decreased while GSSG increased from oocytes through mid-segmentation, then oscillated until hatch. GSH <sub>T</sub> concentration increased between 12 hpf and hatching. E <sub>h</sub> was oxidized during the first 12 h, and then oscillated around -190 mV through organogenesis, E <sub>h</sub> was reduced after hatch (-220 mV) | this study |
